# Supplementary material for: Enhanced thermomechanical properties of epoxy-multiwalled CNT nano-composites
Source: Royal Society of Chemistry journal article supplement (doi:10.1039/d4ra06831a), 2024-01-01
Supplement: d4ra06831a1.pdf [file d4ra06831a1.pdf]

**Preparation of Epoxy-Multiwalled CNT Nano-Composites and the enhancement of thermomechanical properties by incorporating modified MWCNT as reinforcing material.**

Abdullah Alhendal<sup>1\*</sup>

<sup>1</sup>Department of Chemistry, Kuwait University, P. O. Box 5969, Safat, 13060, Kuwait.

\*Corresponding author Email: [Abdullah.alhendal@ku.edu.kw](mailto:Abdullah.alhendal@ku.edu.kw).

---

**Table 1S.** FT-IR frequency of epoxy vs cured epoxy.

Table 2. FTIR frequency of epoxy vs cured epoxy

| Wavenumber cm <sup>-1</sup> | Assignments                                   |
|-----------------------------|-----------------------------------------------|
| 3437                        | N-H stretching                                |
| 3057                        | C-H stretching                                |
| 3037                        | C-H stretching                                |
| 2966                        | Asymmetrical C-H stretching CH <sub>3</sub>   |
| 2928                        | Asymmetrical C-H stretching CH <sub>2</sub>   |
| 2882                        | Aldehyde C-H stretching                       |
| 2872                        | CH <sub>2</sub> sym. & asym stretching        |
| 1740                        | C=O stretching                                |
| 1610                        | N-H bending                                   |
| 1582                        | N-H bending                                   |
| 1513                        | Deformation vibration mode of CH <sub>3</sub> |
| 1460                        | C-H deformation, CH <sub>2</sub>              |
| 1385                        | Symmetrical C-H deformation, CH <sub>3</sub>  |
| 1362                        | C-O stretching                                |
| 1298                        | C-H in plane bending                          |
| 1246                        | C-H in plane bending                          |
| 1084                        | C-H in plane bending                          |
| 1035                        | C-H in plane bending                          |
| 975                         | C-H out of plane deformation                  |
| 914                         | Epoxide ring                                  |
| 832                         | C-H out of plane deformation                  |
| 560                         | O-H out of plane vibration                    |
